# Supplementary material
Source: publisher figshare collection journal article supplement (https://acs.figshare.com/ndownloader/files/20472075)
Supplement: Supplementary file 1 [file 20472075]

## Supporting Information

### **Anisotropic N-Modification of the Mo<sub>4</sub> Ensemble for Efficient Ammonia Synthesis on Molybdenum Nitrides**

Jiankang Zhao<sup>a</sup>, Chaonan Cui<sup>a,b</sup>, Hua Wang<sup>a</sup>, Jinyu Han<sup>a</sup>, Xinli Zhu<sup>\*,a</sup>, Qingfeng Ge<sup>\*,a,c</sup>

<sup>a</sup>*Collaborative Innovation Centre of Chemical Science and Engineering, School of Chemical Engineering and Technology, Tianjin University, Tianjin 300072, China*

<sup>b</sup>*State Key Laboratory for Structural Chemistry of Unstable and Stable Species, Institute of Chemistry, Chinese Academy of Sciences, Beijing 100190, China*

<sup>c</sup>*Department of Chemistry and Biochemistry, Southern Illinois University, Carbondale, IL 62901, United States*

## 1. Optimized structures

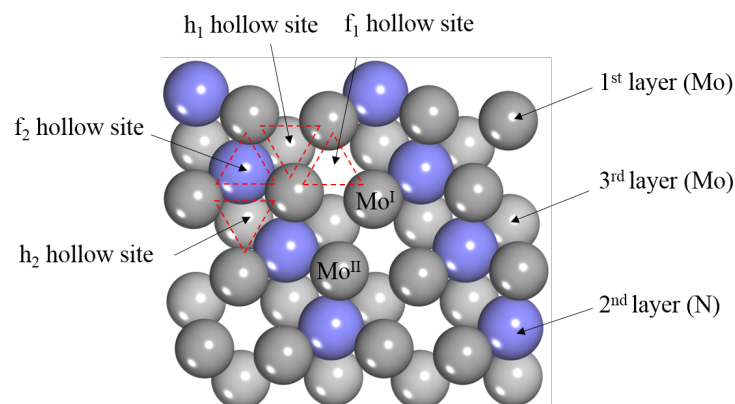

**Figure S1.** Top view of the Mo-terminated  $\text{Mo}_2\text{N}(111)$  surface. h and f represent the hcp and fcc hollow sites, respectively. Gray = Mo and blue = N.

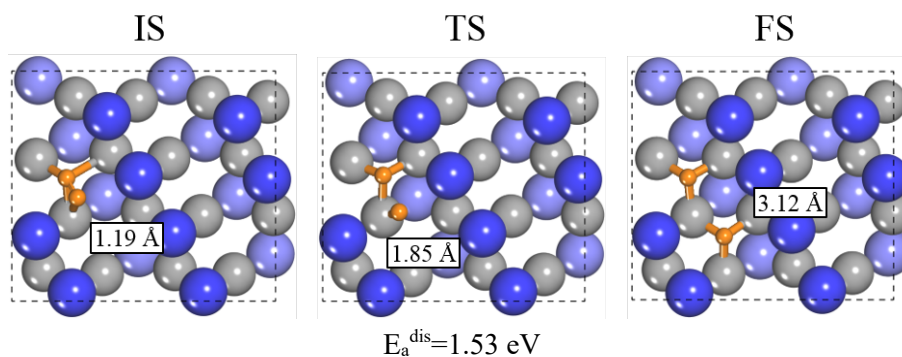

**Figure S2.** Adsorption and dissociation of  $\text{N}_2$  on the N-terminated  $\text{Mo}_2\text{N}(111)$  surface.

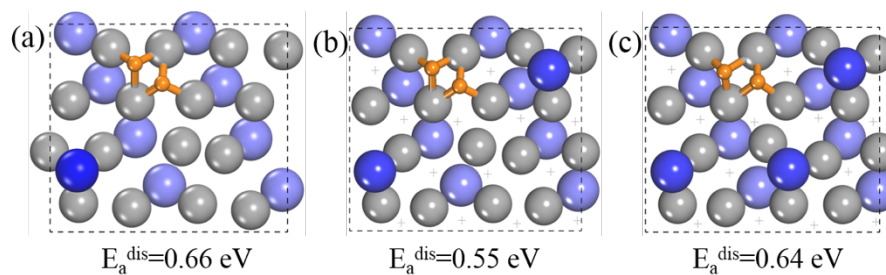

**Figure S3.** Top view of the TSs for  $\text{N}_2$  activation with one (a), two (b) and three  $\text{N}_s$  atoms (c) on the surface but away from the  $\text{Mo}_4$  active sites on the Mo-terminated  $\text{Mo}_2\text{N}(111)$  surface. The corresponding activation barriers for dissociation are provided.

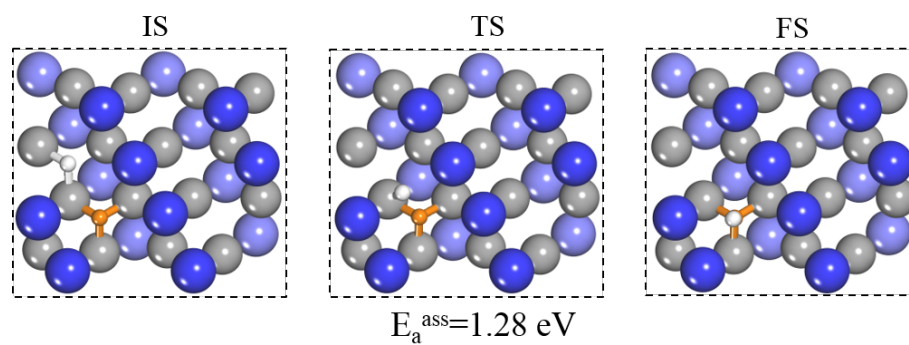

**Figure S4.** Hydrogenation of N on the N-terminated  $\text{Mo}_2\text{N}(111)$  surface.

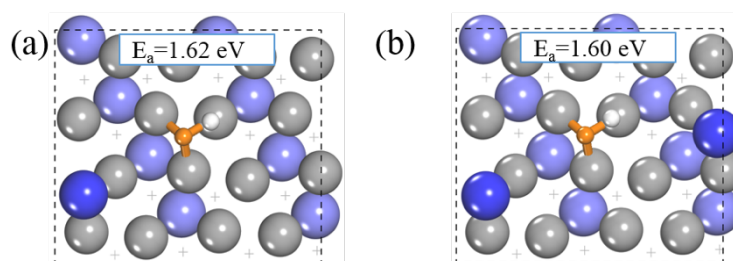

**Figure S5.** Top view of the TSs for N hydrogenation with one (a) and two  $\text{N}_s$  atoms (b) but away from the  $\text{Mo}_4$  active sites. The corresponding activation barriers are shown in the figure.

## 2. Related structural parameters and energies during hydrogenation

**Table S1.** The N-N distance in TS for N<sub>2</sub> dissociation and ZPE-corrected activation barriers on different ensembles.

| Ensembles                       | Domains | Label         | $d_{\text{N-N}}/\text{\AA}$ | $E_{\text{act}}/\text{eV}$ |
|---------------------------------|---------|---------------|-----------------------------|----------------------------|
| Mo <sub>4</sub> N <sub>s</sub>  | D1      | #1            | 1.71                        | 0.33                       |
|                                 |         | #2            | 1.69                        | 0.41                       |
|                                 |         | #3            | 1.70                        | 0.60                       |
|                                 |         | #8            | 1.70                        | 0.66                       |
|                                 |         | #9            | 1.68                        | 0.68                       |
|                                 | D2      | #10           | 1.76                        | 0.60                       |
|                                 |         | #6            | 1.70                        | 0.64                       |
|                                 |         | #12           | 1.69                        | 0.37                       |
|                                 | D3      | #13           | 1.68                        | 0.64                       |
|                                 |         | #4            | 1.85                        | 1.55                       |
| Mo <sub>4</sub> N <sub>2s</sub> | D1      | #2+#10        | 1.72                        | 0.51                       |
|                                 | D2      | #6+#12        | 1.67                        | 0.30                       |
|                                 | D1+D2   | #6+#10        | 1.72                        | 0.56                       |
|                                 | D1+D2   | #2+#12        | 1.67                        | 0.35                       |
|                                 | D1      | #8+#10        | 1.69                        | 0.65                       |
| Mo <sub>4</sub> N <sub>3s</sub> | D1+D2   | #2+#6+#10     | 1.70                        | 0.46                       |
|                                 | D1+D2   | #2+#10+#12    | 1.68                        | 0.27                       |
| Mo <sub>4</sub> N <sub>4s</sub> | D1+D2   | #2+#6+#10+#12 | 1.67                        | 0.26                       |

**Table S2.** The N-H distance at the 3-centered TS with H atop Mo(4) for N hydrogenation and the activation barriers (without ZPE correction) of N hydrogenation at different local active site environment.

| Ensembles                  | Domains | Label         | $d_{\text{N-H}}/\text{\AA}$ | $E_{\text{act}}/\text{eV}$ |
|----------------------------|---------|---------------|-----------------------------|----------------------------|
| $\text{Mo}_4\text{N}_s$    | D1      | #2            | 1.47                        | 1.38                       |
|                            |         | #9            | 1.45                        | 1.61                       |
|                            |         | #10           | 1.46                        | 1.59                       |
|                            | D2      | #6            | 1.52                        | 1.51                       |
|                            |         | #12           | 1.47                        | 1.34                       |
|                            | D3      | #4            | 1.47                        | 1.44                       |
| $\text{Mo}_4\text{N}_{2s}$ | D1      | #2+#10        | 1.45                        | 1.44                       |
|                            | D2      | #6+#12        | 1.51                        | 1.56                       |
|                            | D1+D2   | #10+#12       | 1.44                        | 1.49                       |
|                            | D1+D2   | #2+#12        | 1.50                        | 1.19                       |
|                            | D1      | #8+#10        | 1.47                        | 1.68                       |
| $\text{Mo}_4\text{N}_{3s}$ | D1+D2   | #6+#10+#12    | 1.40                        | 1.61                       |
|                            | D1+D2   | #2+#10+#12    | 1.46                        | 1.48                       |
| $\text{Mo}_4\text{N}_{4s}$ | D1+D2   | #2+#6+#10+#12 | 1.45                        | 1.52                       |

**Table S3.** The N-H distance at the 3-centered TS with H atop Mo(4) for NH hydrogenation and the activation barriers (without ZPE correction) of NH hydrogenation at different local active site environment.

| Ensembles                       | Domains | Label         | $d_{\text{N-H}}/\text{\AA}$ | $E_{\text{act}}/\text{eV}$ |
|---------------------------------|---------|---------------|-----------------------------|----------------------------|
| Mo <sub>4</sub> N <sub>s</sub>  | D1      | #2            | 1.39                        | 1.75                       |
|                                 |         | #10           | 1.39                        | 1.92                       |
|                                 | D2      | #6            | 1.41                        | 1.81                       |
|                                 |         | #12           | 1.38                        | 1.76                       |
| Mo <sub>4</sub> N <sub>2s</sub> | D3      | #4            | 1.40                        | 1.88                       |
|                                 | D1+D3   | #4+#10        | 1.38                        | 1.69                       |
|                                 | D2+D2   | #6+#12        | 1.37                        | 1.61                       |
|                                 | D1+D2   | #2+#12        | 1.42                        | 1.70                       |
| Mo <sub>4</sub> N <sub>3s</sub> | D1+D2   | #2+#10+#12    | 1.39                        | 1.61                       |
|                                 | D1+D2   | #6+#10+#12    | 1.33                        | 1.60                       |
| Mo <sub>4</sub> N <sub>4s</sub> | D1+D2   | #2+#6+#10+#12 | 1.28                        | 1.39                       |

### 3. Microkinetic analysis

The elementary reaction steps of ammonia synthesis on Mo<sub>2</sub>N (111) include,

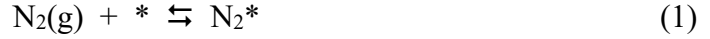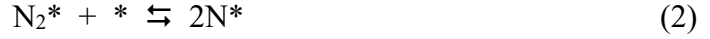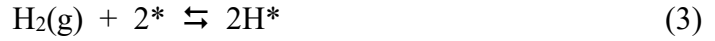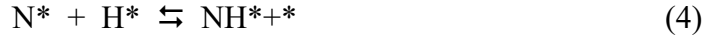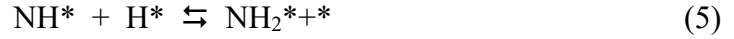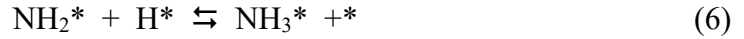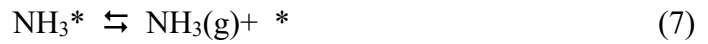

The adsorption of N<sub>2</sub>, H<sub>2</sub> and NH<sub>3</sub> has been treated within the collision theory<sup>1, 2</sup> and the non-activated adsorption rate  $k_a$  can be expressed as,

$$k_a = \frac{S\sigma}{\sqrt{2\pi m k_B T}} \quad (8)$$

where  $m$ ,  $k_B$  and  $T$  are the molecular mass, Boltzmann constant and temperature, respectively. The sticking coefficient  $\sigma$  was assumed to be 1.  $S$  is the average area of the adsorption site and is set to be  $1.2 \times 10^{-18} \times 1/16 \text{ m}^2$  for each Mo<sub>4</sub> ensemble. The desorption was considered based on the adsorption/desorption equilibrium, i.e.

$$K = \frac{k_a}{k_d} = e^{\frac{\Delta H - T\Delta S}{RT}} \quad (9)$$

The contribution of the elevated temperature to the reaction enthalpy was taken into account by including a  $C_p\Delta T$  ( $C_p$ , heat capacity) term.

For the surface reactions, the forward rate constants were estimated using transition state theory,

$$k_f = \frac{k_B T}{h} \frac{q_{TS,vib}}{q_{IS,vib}} e^{-E_a/k_B T} \quad (10)$$

where  $k_B$  and  $h$  are the Boltzmann constant and Planck's constant.  $E_a$  is ZPE-corrected activation barrier for forward reaction.  $q_{TS,vib}$  and  $q_{IS,vib}$  are the vibrational partition functions for the

transition state and initial state, respectively.

The reaction rate of each elementary step is then,

$$r_1 = k_1 p_{N_2} \theta^* - k_{-1} \theta_{N_2} \quad (11)$$

$$r_2 = k_2 \theta_{N_2} \theta^* - k_{-2} \theta_N^2 \quad (12)$$

$$r_3 = k_3 P_{H_2} \theta^* - k_{-3} \theta_H^2 \quad (13)$$

$$r_4 = k_4 \theta_N \theta_H - k_{-4} \theta_{NH} \theta^* \quad (14)$$

$$r_5 = k_5 \theta_{NH} \theta_H - k_{-5} \theta_{NH_2} \theta^* \quad (15)$$

$$r_6 = k_6 \theta_{NH_2} \theta_H - k_{-6} \theta_{NH_3} \theta^* \quad (16)$$

$$r_7 = k_7 \theta_{NH_3} - k_{-7} P_{NH_3} \theta^* \quad (17)$$

where  $r_j$  is the rate of each step,  $k_j$  and  $k_{-j}$  the forward and backward rate constant,  $\theta_i$  the coverage of each species, and  $\theta^*$  the coverage of vacancies.

A set of algebraic differential equations are then generated for each intermediate,

$$\frac{d\theta_i}{dt} = \sum_j v_{i,j} r_j \quad (18)$$

$$\sum_i \theta_i = 1 - \theta^* \quad (19)$$

A steady-state is achieved when the change in the coverage of all intermediates approach zero. The surface coverage was obtained by solving the differential equations using the SciPy Python package. The reaction rate and TOF can be obtained.



**Table S4.** The calculated activation barriers, and the corresponding rate constants of forward and reverse reaction for each elementary step on the Mo-terminated surface with N/Mo ratio of 0.

| Step no. | Reaction              | Mo-terminated surface with N/Mo ratio = 0/16 |           |          |          |
|----------|-----------------------|----------------------------------------------|-----------|----------|----------|
|          |                       | $E_{a,f}$                                    | $E_{a,r}$ | $k_f$    | $k_r$    |
| 1        | $N_2+*=N_2^*$         | /                                            | 2.27(#)   | 1.44E+08 | 7.68E+00 |
| 2        | $N_2+*=2N^*$          | 0.58                                         | 1.64      | 2.26E+08 | 4.12E+02 |
| 3        | $H_2+2*=2H^*$         | /                                            | 1.94(#)   | 5.39E+08 | 5.62E+00 |
| 4        | $N^*+H^*=NH^*+*$      | 1.43                                         | 1.14      | 6.06E+01 | 1.64E+03 |
| 5        | $NH^*+H^*=NH_2^*+*$   | 1.65                                         | 0.66      | 2.72E+00 | 5.51E+07 |
| 6        | $NH_2^*+H^*=NH_3^*+*$ | 1.75                                         | 0.87      | 1.52E+00 | 3.94E+05 |
| 7        | $NH_3^*=NH_3+*$       | 2.04(#)                                      | /         | 1.62E+01 | 1.85E+08 |

**Table S5.** The calculated activation barriers, and the corresponding rate constants of forward and reverse reaction for each step on N-terminated surface with N/Mo ratio of 8/16.

| Step no. | Reaction              | N-terminated surface with N/Mo ratio = 8/16 |           |          |          |
|----------|-----------------------|---------------------------------------------|-----------|----------|----------|
|          |                       | $E_{a,f}$                                   | $E_{a,r}$ | $k_f$    | $k_r$    |
| 1        | $N_2+*=N_2^*$         | /                                           | 0.16(#)   | 1.44E+08 | 4.86E+16 |
| 2        | $N_2^*+*=2N^*$        | 1.53                                        | 3.23      | 5.97E+00 | 1.96E-11 |
| 3        | $H_2+2*=2H^*$         | /                                           | 1.62(#)   | 5.39E+08 | 1.40E+03 |
| 4        | $N^*+H^*=NH^*+*$      | 1.28                                        | 1.47      | 4.18E+03 | 1.33E+02 |
| 5        | $NH^*+H^*=NH_2^*+*$   | 1.39                                        | 0.41      | 2.73E+02 | 1.34E+09 |
| 6        | $NH_2^*+H^*=NH_3^*+*$ | 1.64                                        | 1.09      | 4.39E+01 | 7.40E+04 |
| 7        | $NH_3^*=NH_3+*$       | 0.87(#)                                     | /         | 9.35E+09 | 1.85E+08 |

**Table S6.** The calculated activation barriers, and the corresponding rate constants of forward and reverse reaction for each step on N-rich surface with N/Mo ratio of 7/16.

| Step no. | Reaction              | N-rich surface with N/Mo = 7/16 |           |          |          |
|----------|-----------------------|---------------------------------|-----------|----------|----------|
|          |                       | $E_{a,f}$                       | $E_{a,r}$ | $k_f$    | $k_r$    |
| 1        | $N_2+*=N_2^*$         | /                               | 1.43(#)   | 1.44E+08 | 1.50E+07 |
| 2        | $N_2^*+*=2N^*$        | 0.99                            | 1.53      | 7.01E+05 | 1.01E+02 |
| 3        | $H_2+2*=2H^*$         | /                               | 1.62(#)   | 5.39E+08 | 1.40E+03 |
| 4        | $N^*+H^*=NH^*+*$      | 1.06                            | 1.25      | 1.86E+05 | 5.91E+03 |
| 5        | $NH^*+H^*=NH_2^*+*$   | 1.32                            | 0.26      | 9.13E+02 | 1.77E+10 |
| 6        | $NH_2^*+H^*=NH_3^*+*$ | 1.61                            | 1.15      | 7.37E+01 | 2.63E+04 |
| 7        | $NH_3^*=NH_3+*$       | 1.25(#)                         | /         | 1.33E+07 | 1.85E+08 |

In Table S4-S6, “/” represent the non-activated adsorption process; (#) represents the activation barriers of desorption process are equal to the desorption energies.

1. Yuan, H.; Zhu, X.; Han, J.; Wang, H.; Ge, Q. Rhenium-Promoted Selective CO<sub>2</sub> Methanation on Ni-Based Catalyst. *J. CO<sub>2</sub> Util.* **2018**, 26, 8-18.
2. Motagamwala, A. H.; Ball, M. R.; Dumesic, J. A. Microkinetic Analysis and Scaling Relations for Catalyst Design. *Annu. Rev. Chem. Biomol. Eng.* **2018**, 9, 413-450.
